# Supplementary material
Source: PubMed Central journal article supplement (PMC9772037)
Supplement: NIHMS1850845-supplement-1.pdf [file NIHMS1850845-supplement-1.pdf]

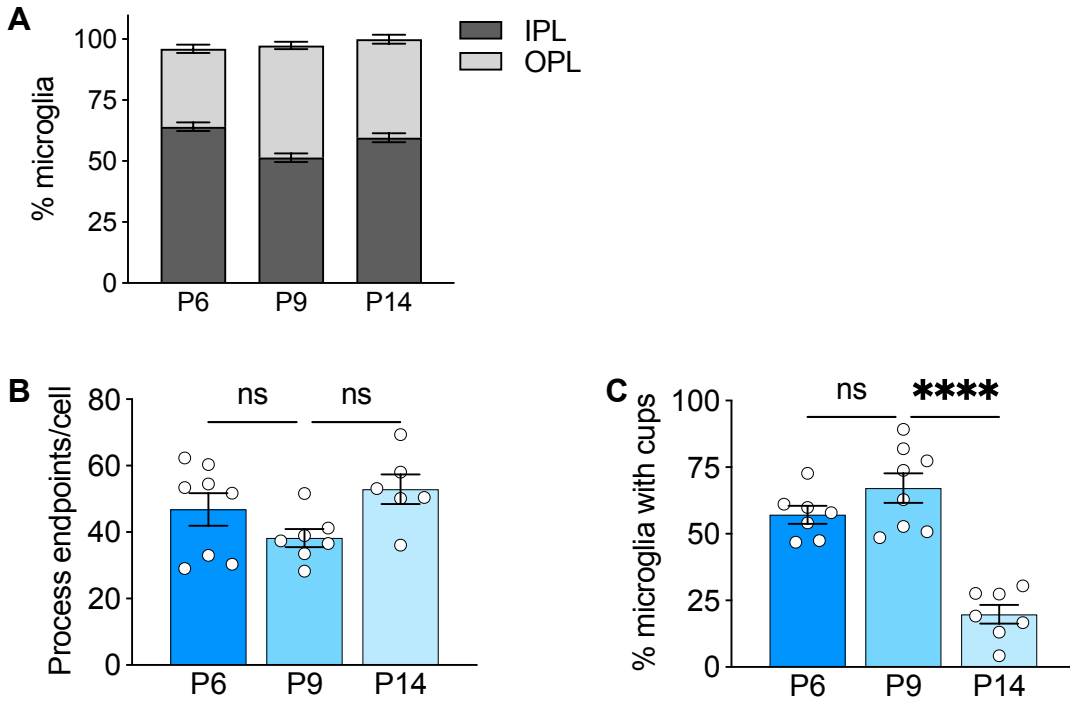

**Figure S1. Microglia localization to synapse layers coincided with synapse emergence, Related to Figure 1**

(A) Quantification of microglia spatial distribution between the inner plexiform (IPL) and outer plexiform (OPL) layers at P6, P9, and P14. n=3 mice for P6, n=4 for P9, n=4 for P14.

(B) Quantification of process endpoints per microglia at P6, P9, and P14 in WT retinas. n=8 mice for P6, n=7 for P9, n=6 for P14, one-way ANOVA with posthoc Bonferroni correction.

(C) Quantification of percent microglia with phagocytic cups at P6, P9, and P14 in WT retinas. n=7 for P6, n=8 for P9, n=7 for P14, one-way ANOVA with posthoc Bonferroni correction.

Data were pooled from two to three independent experiments. All data are presented as the mean  $\pm$  SEM. \*\*\*\*p<0.0001, ns, not significant.

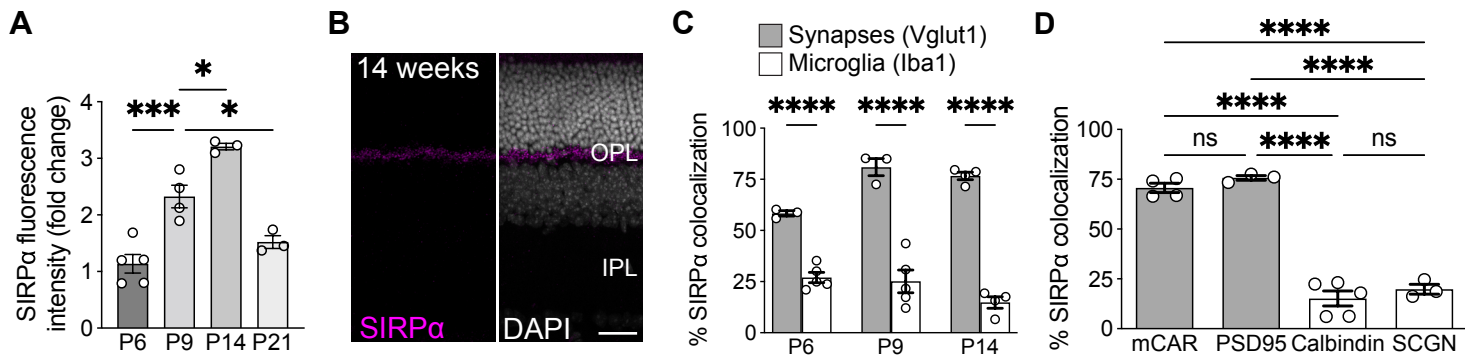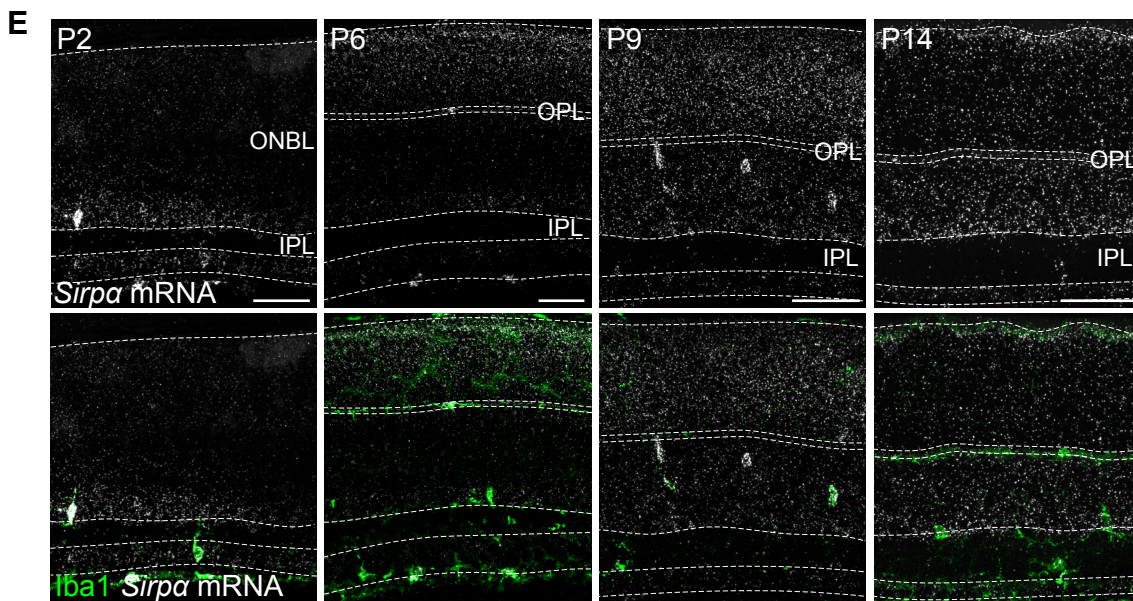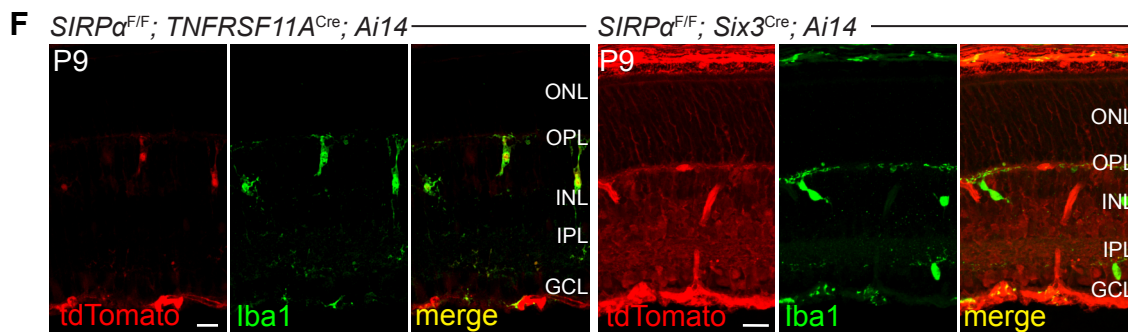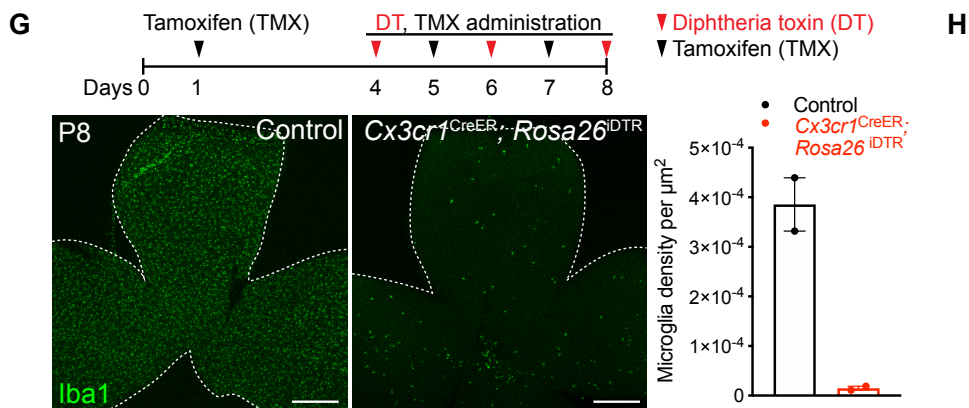

**Figure S2. Neurons produced the majority of SIRP $\alpha$ , Related to Figures 2, 3.**

(A) Quantification of the mean SIRP $\alpha$  fluorescence intensity in OPL at P6, P9, P14 and P21 in WT mice. n=5 for P6, n=4 for P9, n=3 for P14, n=3 for P21. Data were compared using two-way ANOVA with posthoc Bonferroni correction.

(B) Representative confocal image showing SIRP $\alpha$  expression (magenta) in the OPL at 14 weeks. Scale bars, 25  $\mu$ m.

(C) Quantification of the degree of colocalization between SIRP $\alpha$  and synapses (Vglut1) or microglia (Iba1) in P6, P9, and P14 WT retinas using Manders' coefficients (MCC). n=3 per timepoint for Vglut1, n=4 per timepoint for Iba1 quantifications. Data were compared using two-way ANOVA with posthoc Bonferroni correction.

(D) Quantification of the degree of colocalization between SIRP $\alpha$  and presynaptic markers (mCAR for cone terminals, PSD95 for rod terminals) or postsynaptic markers (Calbindin for horizontal cell dendrites, SCGN for cone bipolar cell dendrites) in P14 WT retinas using Manders' coefficients (MCC). n=4 for mCAR, n=3 for PSD95, n=5 for Calbindin, and n=3 for SCGN. Data were compared using two-way ANOVA with posthoc Bonferroni correction.

(E) Representative fluorescence in situ hybridization (RNAscope) images of SIRP $\alpha$  and microglia marker Iba1 in P2, P6, P9, and P14 WT retinas. Scale bars, 50  $\mu$ m.

(F) Representative confocal images of tdTomato expression (red) upon Cre activity in P9 *SIRP $\alpha$ <sup>F/F</sup>; TNFRSF11A<sup>Cre</sup>*; *Ai14* and *SIRP $\alpha$ <sup>F/F</sup>; Six3<sup>Cre</sup>*; *Ai14* retinas stained with microglia marker Iba1 (green). Scale bars, 10  $\mu$ m.

(G) Microglia ablation paradigm. Tamoxifen (TMX) and diphtheria toxin (DT) were administrated at the indicated times (top). Representative confocal images and quantification of microglia number in P8 wholemount *Cx3cr1<sup>CreER</sup>; Rosa26<sup>iDTR</sup>* and control retinas. This model depleted the majority (~96%) of microglia in P8 retinas.

(H) Representative confocal images of SIRP $\alpha$  staining (magenta) in P9 *Cx3cr1<sup>CreER</sup>; Rosa26<sup>iDTR</sup>* and control retinas stained with microglia marker Iba1 (green). Scale bars, 25  $\mu$ m.

Data in (A) to (D) were pooled from 2-3 independent experiments. Data in (G) were obtained from one experiment. All data are presented as the mean  $\pm$  SEM. \*p<0.05, \*\*\*p<0.001, \*\*\*\*p<0.0001, ns, not significant.



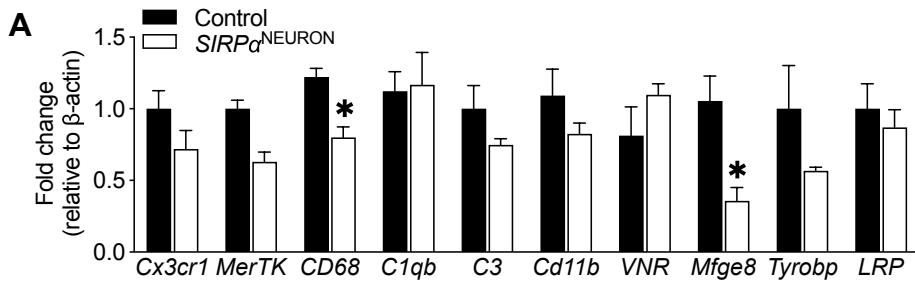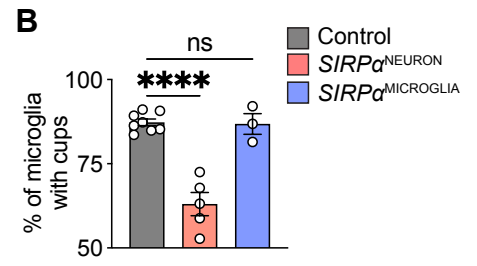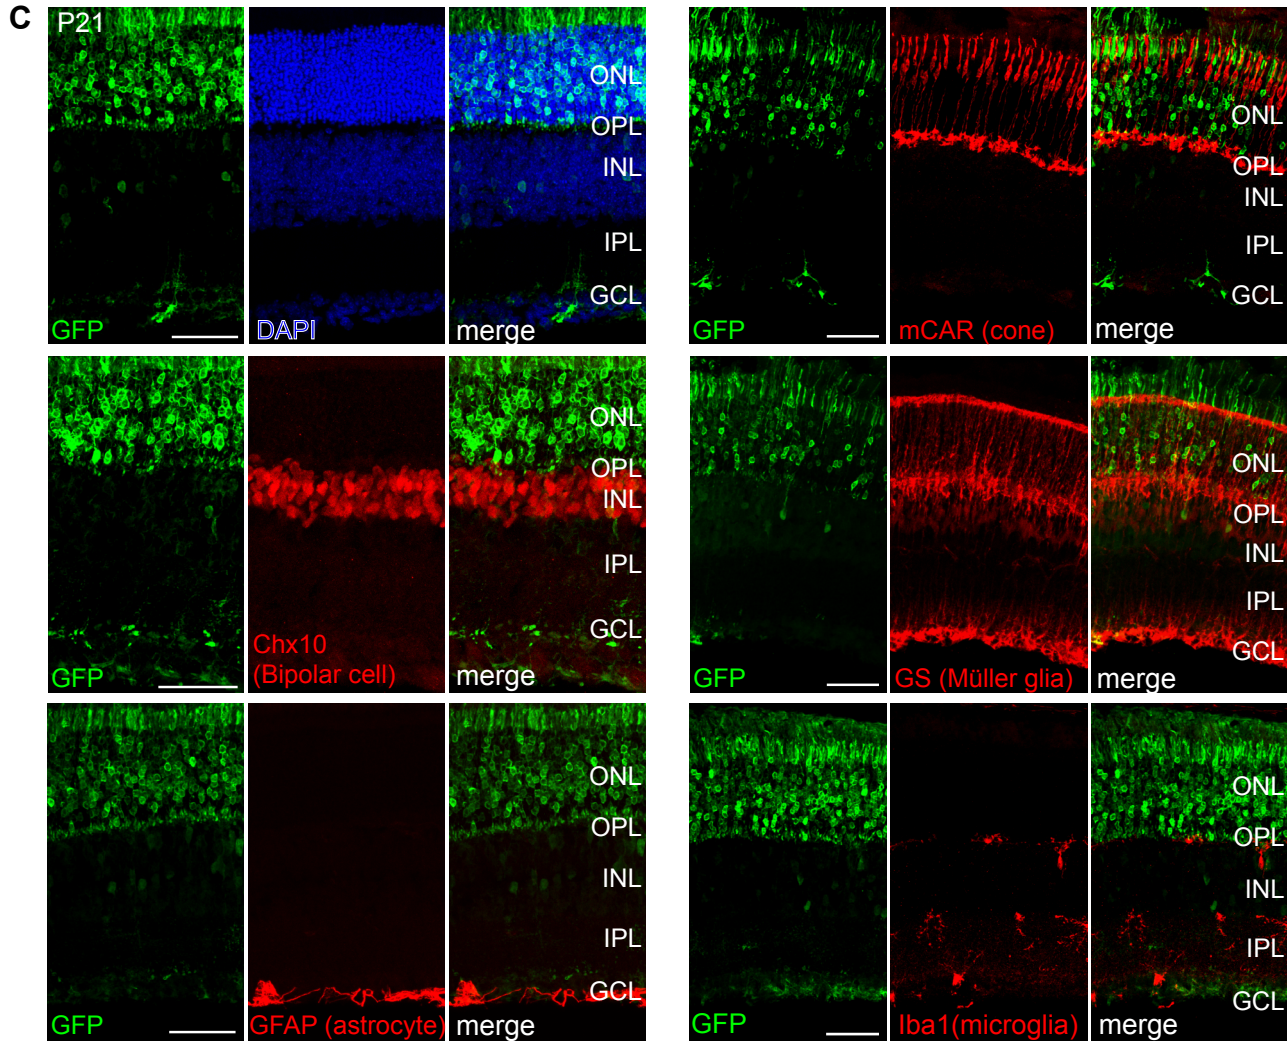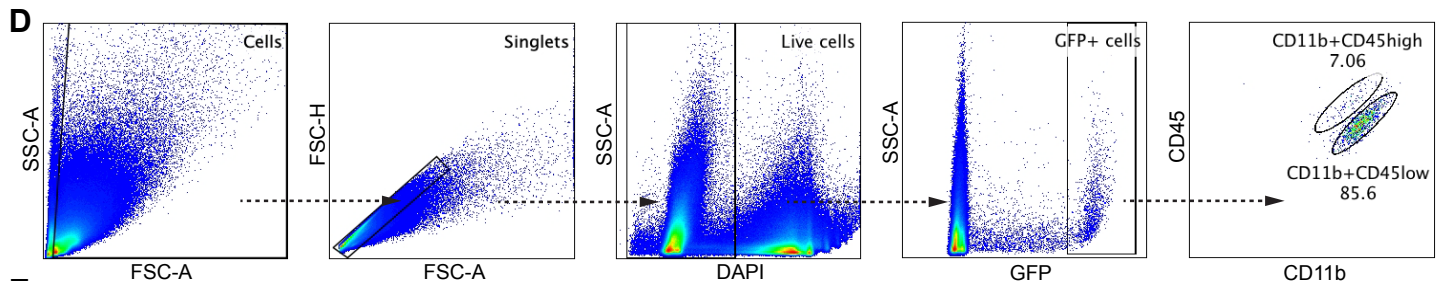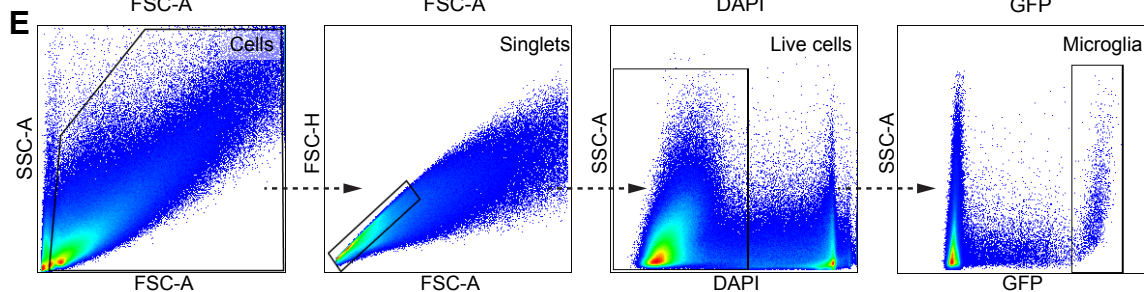



**Figure S3. Additional quantification, validation of electroporation, and gating strategies for microglia engulfment. Related to Figure 3.**

(A) qRT-PCR for selected phagocytic pathway related genes in whole retina when neuronal SIRP $\alpha$  is removed. Values represent fold change in mRNA expression levels relative to the levels detected in controls for each gene following normalization to  $\beta$ -actin. n=3 control, 4 SIRP $\alpha$ <sup>NEURON</sup> mice, unpaired *t*-test.

(B) Percent microglia with and without phagocytic cups in control, SIRP $\alpha$ <sup>NEURON</sup>, and SIRP $\alpha$ <sup>MICROGLIA</sup> microglia. n=8 control, 4 SIRP $\alpha$ <sup>NEURON</sup>, 3 SIRP $\alpha$ <sup>MICROGLIA</sup> mice. Data were compared using two-way ANOVA with posthoc Bonferroni correction.

(C) Representative confocal images following electroporation at P0 with plasmids overexpressing pCAG-GFP showing that *in vivo* electroporation mainly targets photoreceptors, with minimal expression in bipolar cells and Muller glia. Microglia and astrocytes are not targeted by electroporation. Scale bars, 50  $\mu$ m.

(D) Validation of flow cytometry gating for Cx3cr1-GFP microglia shows that the majority of GFP<sup>+</sup> cells are CD11b<sup>+</sup>CD45<sup>low</sup> microglia.

(E) Flow cytometry gating for microglial phagocytosis in Cx3cr1-GFP-positive microglia from SIRP $\alpha$ <sup>NEURON</sup>; Cx3cr1<sup>GFP/+</sup> and SIRP $\alpha$ <sup>F/F</sup>; Cx3cr1<sup>GFP/+</sup> retinas following incubation with yeast particles conjugated to pHrodo red.

Data from (A) were pooled from two independent experiments. Data from (B) were obtained from one experiment. All data are presented as the mean  $\pm$  SEM. \*p<0.05, \*\*\*\*p<0.0001, ns, not significant.

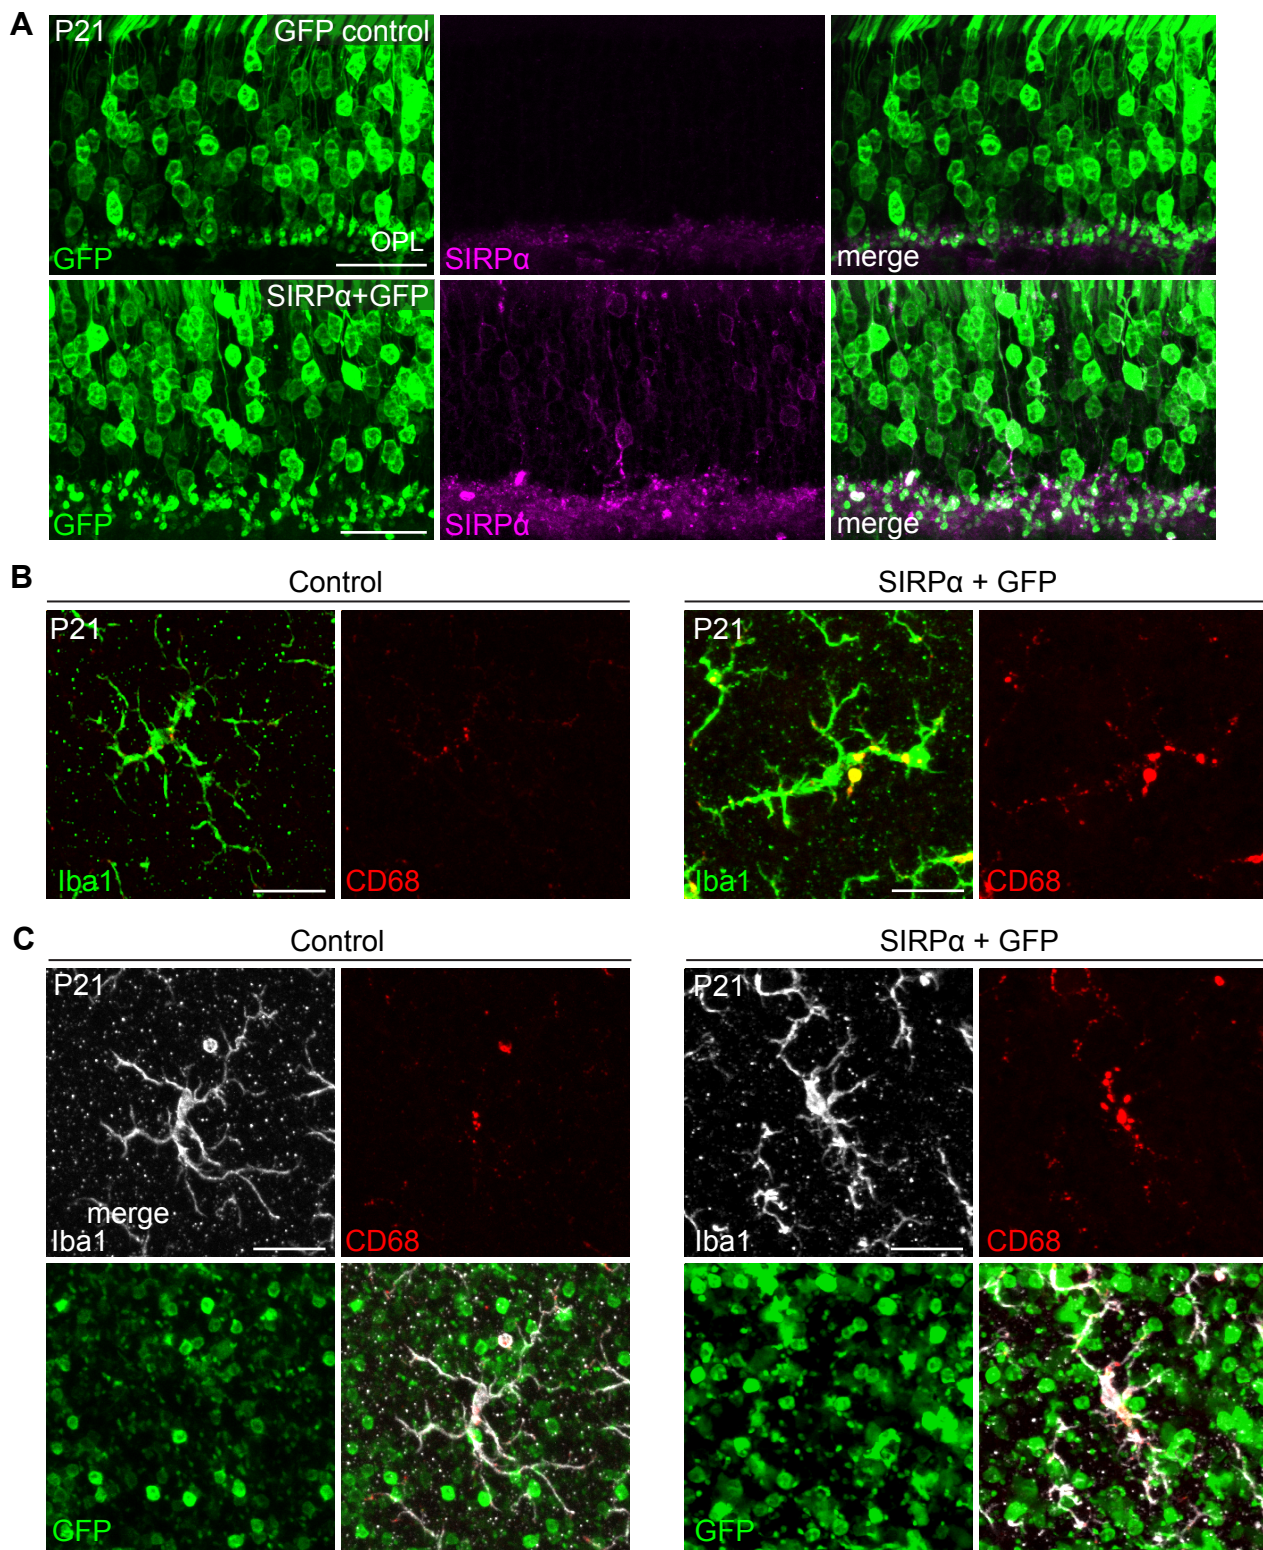

**Figure S4. Validation of SIRP $\alpha$  overexpression following *in vivo* retinal electroporation. Related to Figure 5.**

(A) Representative images of staining for GFP and SIRP $\alpha$  at P21 in WT retinas following electroporation with plasmids overexpressing GFP or GFP+SIRP $\alpha$ . Scale bars, 25  $\mu$ m.

(B) Representative immunofluorescence images of 3D surface rendering in Figure 5B of Iba1-labeled microglia (green) containing CD68-labeled lysosomes (red) at P21 in WT retinas following electroporation with plasmids overexpressing GFP or GFP+SIRP $\alpha$ . Scale bars, 25  $\mu$ m.

(C) Representative immunofluorescence images of 3D surface rendering in Figure 5L of Iba1-labeled microglia (gray) containing CD68-labeled lysosomes (red) and engulfed GFP-labeled neural material (green) at P21 in WT retinas following electroporation with plasmids overexpressing GFP or GFP+SIRP $\alpha$ . Scale bars, 25  $\mu$ m.

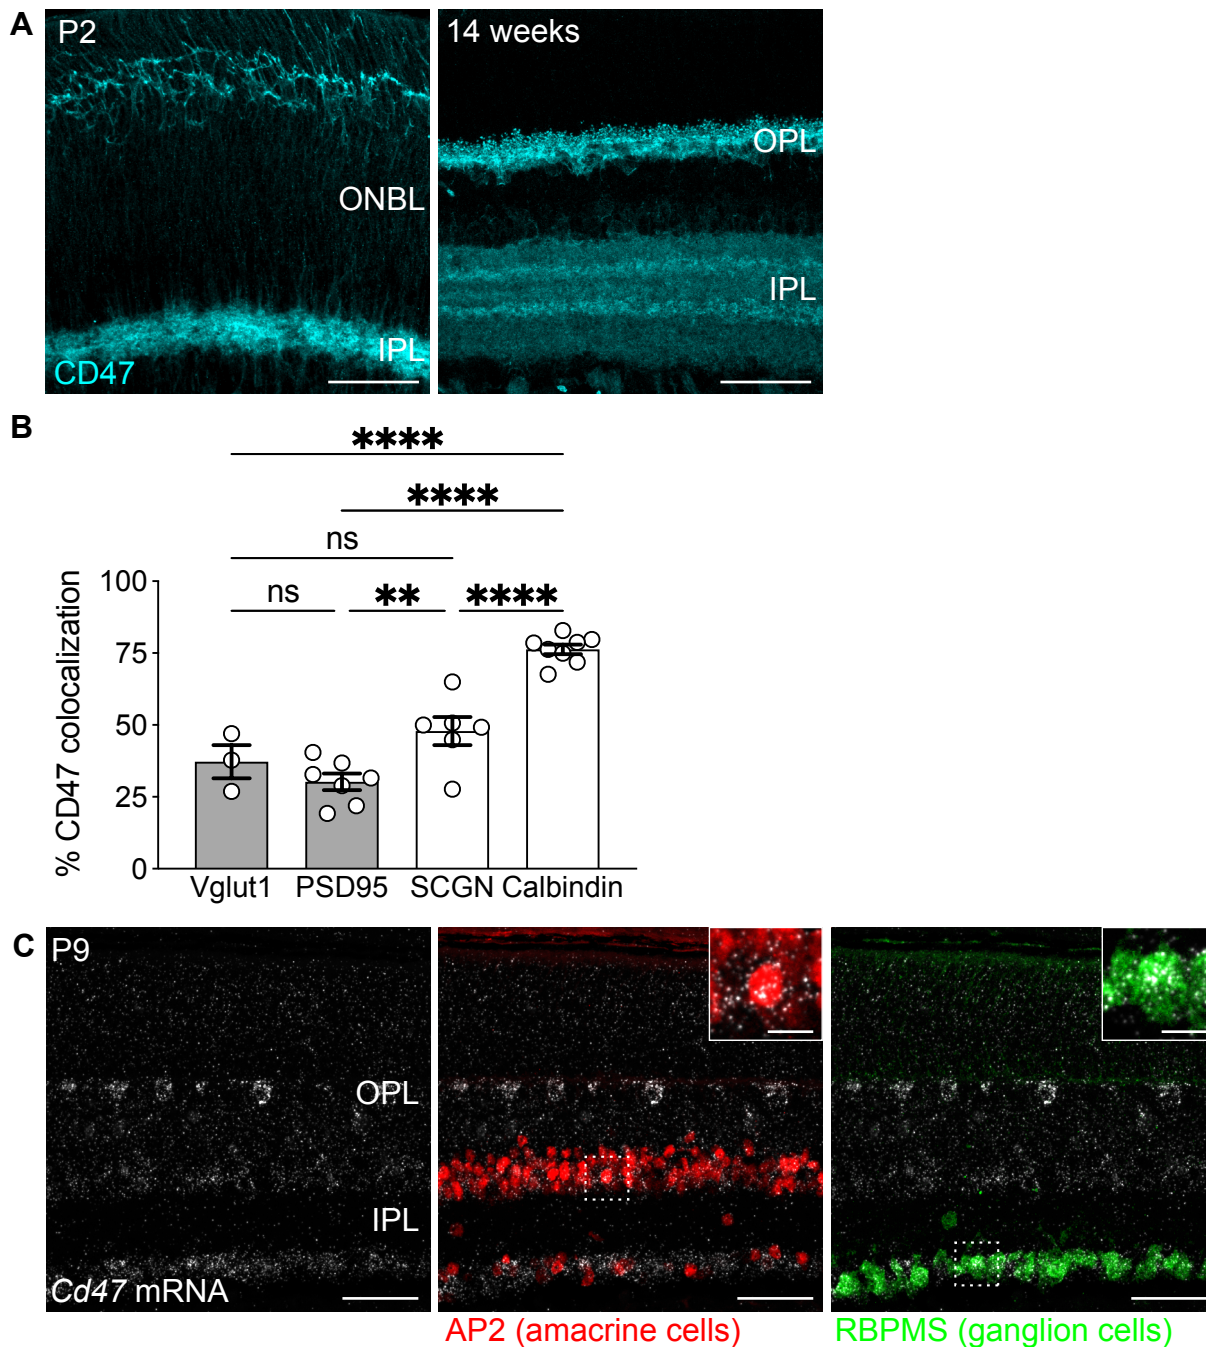

**Figure S5. CD47 was expressed in postsynaptic cells, Related to Figure 6.**

(A) Representative confocal images of CD47 expression in P2 and adult WT retinas. Scale bars, 50  $\mu$ m.

(B) Quantification of the degree of colocalization between CD47 and presynaptic markers (Vglut1 and PSD95 for photoreceptor terminals) or postsynaptic markers (Calbindin for horizontal cell dendrites, SCGN for cone bipolar cell dendrites) at P14 in WT retinas using Manders' coefficients (MCC).  $n=3$  for Vglut1,  $n=7$  for PSD95,  $n=6$  for SCGN,  $n=7$  for Calbindin. Data were compared using two-way ANOVA with posthoc Bonferroni correction.

(C) Representative smFISH images of *Cd47* mRNA with IHC staining for inner retina neurons (AP2 for amacrine cells, red; RBPMS for ganglion cells, green) at P9 in WT retinas. Scale bars, 50  $\mu$ m and 10  $\mu$ m (insets).

Data from (B) were pooled from two to three independent experiments. All data are presented as the mean  $\pm$  SEM. \*\* $p < 0.01$ , \*\*\*\* $p < 0.0001$ , ns, not significant.



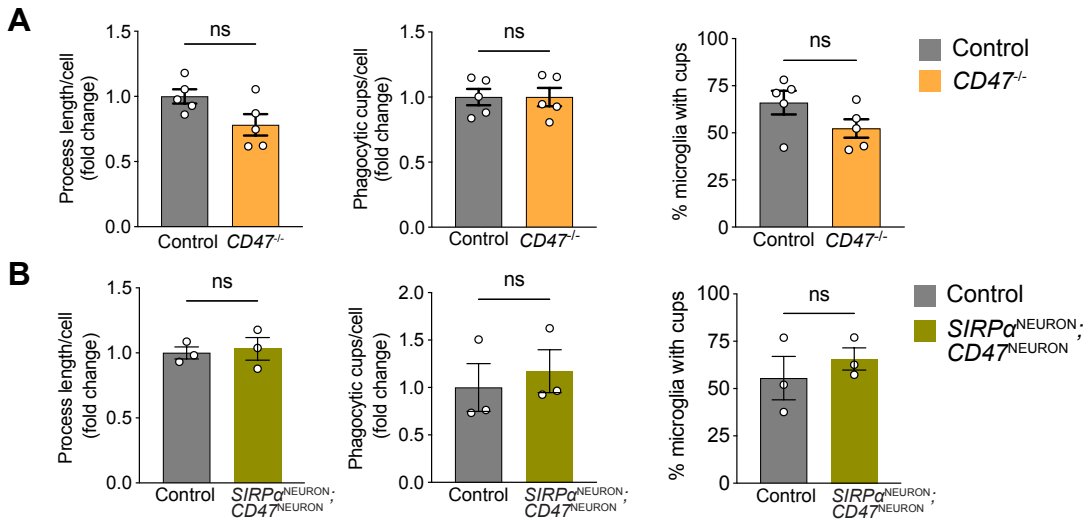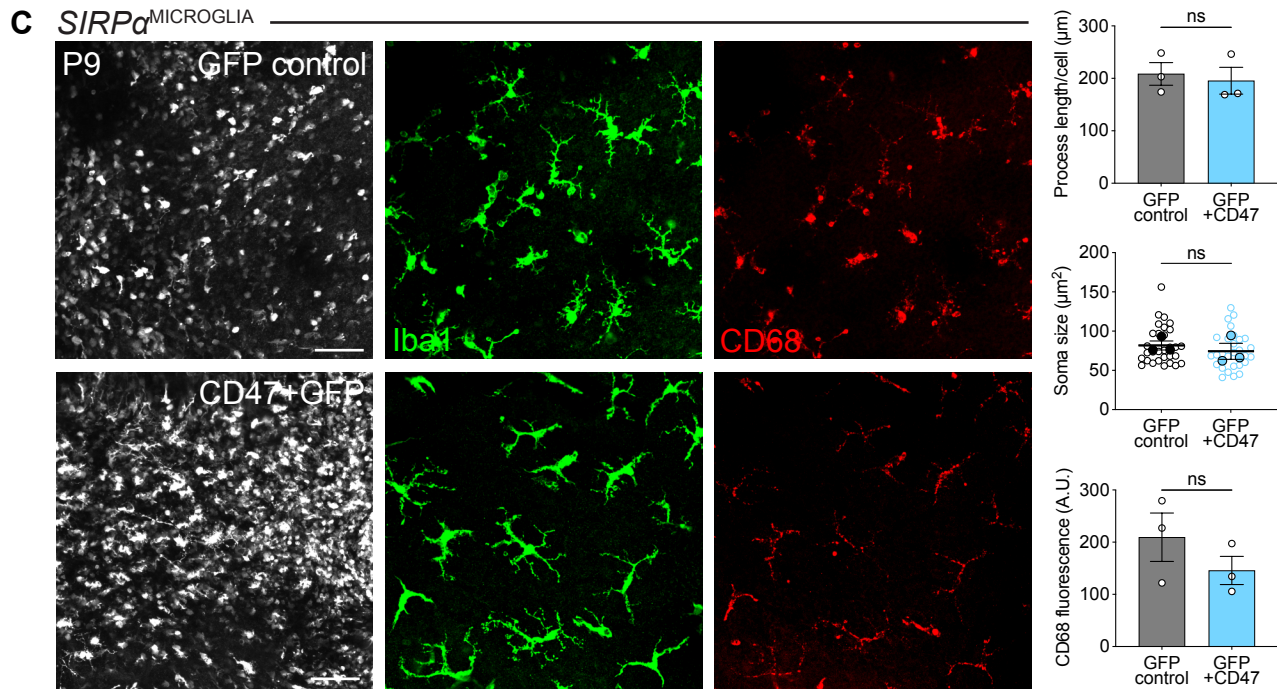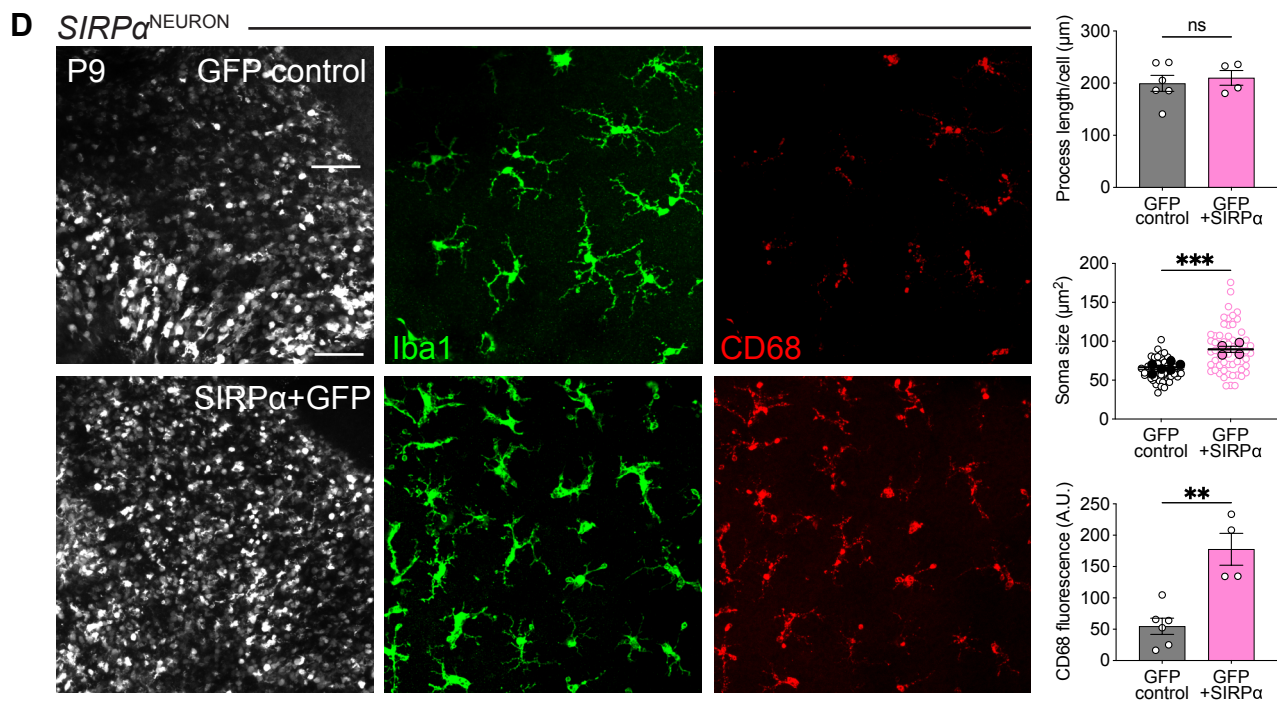

**Figure S6. Neuronal SIRP $\alpha$  limited inhibitory CD47 signaling to microglia, Related to Figure 7.**

**(A)** Additional quantifications of microglial morphology and levels of activation, including process length, number of phagocytic cups per cell, and percentage of microglia with cups in CD47 null mice and controls. n=5 mice per group, unpaired *t*-test.

**(B)** Additional quantifications of microglial morphology and levels of activation, including process length, number of phagocytic cups per cell, and percentage of microglia with cups in SIRP $\alpha$ /CD47 double knockout mice and controls. n=3 mice per group, unpaired *t*-test.

**(C)** Representative confocal images of GFP-expressing cells (white), Iba1<sup>+</sup> microglia (green), and CD68<sup>+</sup> lysosomes (red) in GFP and CD47+GFP electroporated SIRP $\alpha$ <sup>MICROGLIA</sup> retinas, viewed in whole-mount. Scale bars, 50  $\mu$ m. n=3 mice per group, unpaired *t*-test.

**(D)** Representative confocal images of GFP-expressing cells (white), Iba1<sup>+</sup> microglia (green), and CD68<sup>+</sup> lysosomes (red) in GFP and SIRP $\alpha$ +GFP electroporated SIRP $\alpha$ <sup>NEURON</sup> retinas, viewed in whole-mount. n=6 control and 4 SIRP $\alpha$ <sup>NEURON</sup> mice, unpaired *t*-test.

Data from **(B)** were obtained from one experiment. All other data were pooled from two to three independent experiments. All data are presented as the mean  $\pm$  SEM. \*\*p<0.01, \*\*\*p<0.001, ns, not significant.
